# Supplementary material
Source: PubMed Central journal article supplement (PMC6437526)
Supplement: AAC.02112-18-s0001.pdf [file AAC.02112-18-s0001.pdf]

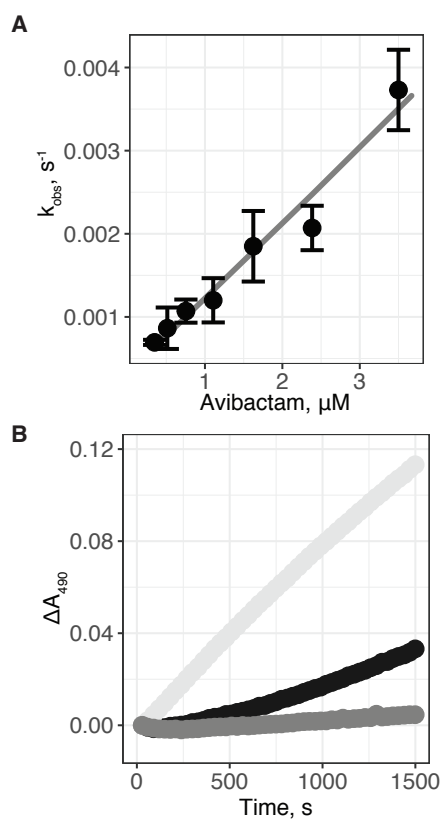

**Figure S1. On and off-rate determination of avibactam to VCC-1. A)** Plot of avibactam concentration vs  $k_{\text{obs}}$  in on-rate experiments. Error bars represent the SD of three separate experiments. **B)** Time course of recovery of VCC-1 activity against following dilution in reaction buffer containing nitrocefin. 1  $\mu\text{M}$  VCC-1 was incubated in the absence (light grey) and presence (black) of 5  $\mu\text{M}$  avibactam, parallel experiment was performed maintaining the initial avibactam concentration (grey).

Supplemental Material, Mangat et al.

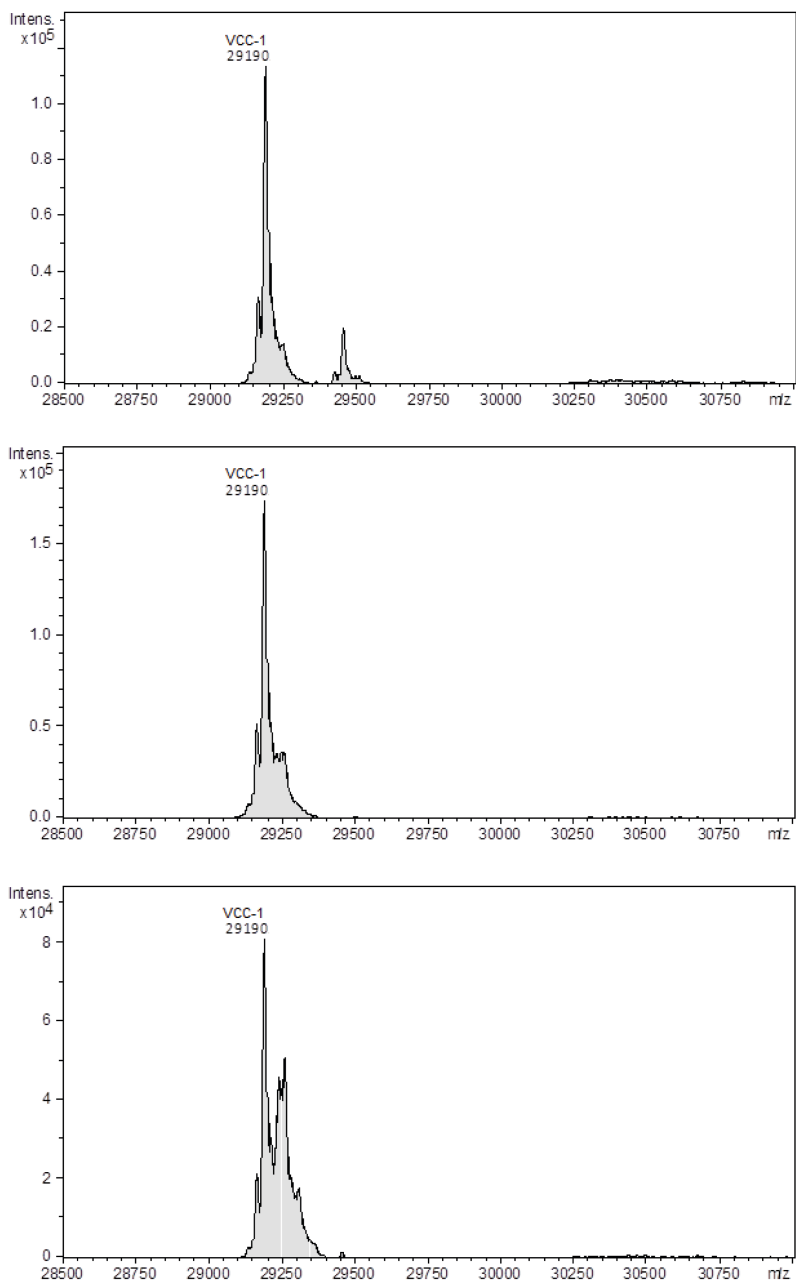

**Figure S2. Reconstructed ESI-MS spectra of unbound VCC-1 (no avibactam).** The mass of unbound VCC-1 is identical the mass of a species that appears over a 32 hr when VCC-1 is incubated with avibactam (Fig. 2). MS measurements were taken in the same time frame (1 hour (top), 10 hours (middle) and 32 hours (bottom)) as shown in Fig 2. The peak at 29,190 amu corresponds to that of recombinant VCC-1 (expected mass = 29,193 amu).

| <b>Table S1: Crystallographic and refinement statistics for apo and avibactam-bound VCC-1.</b> |                                                                                                                                            |                                                                                                     |
|------------------------------------------------------------------------------------------------|--------------------------------------------------------------------------------------------------------------------------------------------|-----------------------------------------------------------------------------------------------------|
| <b>Data collection</b>                                                                         | <b>VCC-1</b>                                                                                                                               | <b>VCC-1 – avibactam</b>                                                                            |
| X-ray source                                                                                   | CLS 08B1-1                                                                                                                                 | Rigaku MicroMax 007HF                                                                               |
| Space group                                                                                    | C2                                                                                                                                         | P4 <sub>3</sub> 2 <sub>1</sub> 2                                                                    |
| Unit cell dimensions                                                                           | $a = 209.93 \text{ \AA}$ , $b = 46.65 \text{ \AA}$ ,<br>$c = 113.61 \text{ \AA}$ ,<br>$\alpha = \gamma = 90^\circ$ , $\beta = 99.28^\circ$ | $a = b = 62.06 \text{ \AA}$ ,<br>$c = 134.35 \text{ \AA}$ ,<br>$\alpha = \beta = \gamma = 90^\circ$ |
| Wavelength (Å)                                                                                 | 0.9795                                                                                                                                     | 1.54                                                                                                |
| Resolution (Å)                                                                                 | 56.06 – 1.70 (1.73 – 1.70)*                                                                                                                | 56.34 – 1.90 (1.94 – 1.90)                                                                          |
| Total observations                                                                             | 549396 (26644)                                                                                                                             | 124852 (6986)                                                                                       |
| Unique observations                                                                            | 119395 (5879)                                                                                                                              | 21085 (1236)                                                                                        |
| Multiplicity                                                                                   | 4.6 (4.5)                                                                                                                                  | 5.9 (5.7)                                                                                           |
| R <sub>merge</sub>                                                                             | 0.052 (0.303)                                                                                                                              | 0.126 (0.636)                                                                                       |
| CC(1/2)                                                                                        | 0.999 (0.970)                                                                                                                              | 0.995 (0.827)                                                                                       |
| I / $\sigma$ I                                                                                 | 13.8 (3.2)                                                                                                                                 | 9.3 (2.3)                                                                                           |
| Completeness (%)                                                                               | 99.5 (98.9)                                                                                                                                | 98.0 (91.1)                                                                                         |
| <b>Refinement</b>                                                                              |                                                                                                                                            |                                                                                                     |
| R <sub>work</sub> / R <sub>free</sub>                                                          | 0.16 / 0.20                                                                                                                                | 0.16 / 0.20                                                                                         |
| Reflections used for R-free                                                                    | 1466 (143)                                                                                                                                 | 1999 (180)                                                                                          |
| Total non-hydrogen atoms                                                                       | 9367                                                                                                                                       | 2274                                                                                                |
| Macromolecules                                                                                 | 8026                                                                                                                                       | 2013                                                                                                |
| Avibactam                                                                                      | -                                                                                                                                          | 17                                                                                                  |
| Solvent                                                                                        | 1341                                                                                                                                       | 248                                                                                                 |
| Average B-factor (Å <sup>2</sup> )                                                             | 26.42                                                                                                                                      | 20.64                                                                                               |
| Macromolecules                                                                                 | 24.81                                                                                                                                      | 19.57                                                                                               |
| Avibactam                                                                                      | -                                                                                                                                          | 20.94                                                                                               |
| Solvent                                                                                        | 36.01                                                                                                                                      | 29.35                                                                                               |
| RMSD<br>bond lengths (Å) /angles (°)                                                           | 0.009/1.28                                                                                                                                 | 0.007/0.88                                                                                          |
| Ramachandran plot<br>favoured/allowed/outliers<br>(%)                                          | 97.10/2.90/0.00                                                                                                                            | 96.92/3.08/0.00                                                                                     |
| * Values for the highest resolution shell are shown in parentheses                             |                                                                                                                                            |                                                                                                     |
